# Supplementary material for: A new ALK isoform transported by extracellular vesicles confers drug resistance to melanoma cells
Source: Springer Nature journal article supplement (doi:10.1186/s12943-018-0886-x), 2018-10-05
Supplement: MOESM1 [file 16176512]

**Table S1: List of Primer sequences**

| Gene     | Forward                        | Reverse                          | Application |
|----------|--------------------------------|----------------------------------|-------------|
| ALK      | 5' AGGGGGCTTGGGTCGTTGGGCATT 3' | 5' TGTCTCGGTGGATGAAGTGGTTTTCC 3' | 5'RACE      |
| ALK      | 5' TGATGGAAGGCCACGGG 3'        | 5' TCAGGCAGCGTCTTCACA 3'         | Sequencing  |
| ALK      | 5' CCTCATTCGGGGTCTGG 3'        | 5' CCCTTTCTATAGTAGCTCGCC 3'      | Sequencing  |
| ALK      | 5' AACTGCCTCTTGACCTGTCC 3'     | 5' TTTTGCCTGTTGAGAGACCA 3'       | Sequencing  |
| ALK      | 5' GGAAGAGAAAGTGCCTGTGAG 3'    | 5' AAGAGAAGTGAGTGTGCGACC 3'      | Sequencing  |
| ALK      | 5' GGGGAGGTGTATGAAGGC 3'       | 5' CGGTGGATGAAGTGGTTTT 3'        | PCR         |
| MMLV-ALK | 5' CAGGCAGTGATGGAAGGC 3'       | 5' CGGTGGATGAAGTGGTTTT 3'        | PCR         |
| ALK      | 5' GCATTGTGTCACCCACCC 3'       | 5' CATGGCTTGCAGCTCCTG 3'         | qPCR        |

**Table S2: ALK siRNA sequences**

|        |                     |
|--------|---------------------|
| siRNA1 | GGGCCUGUAUACCGGAUAA |
| siRNA2 | GUGCCAUGCUGCCAGUUA  |
| siRNA3 | CCGCUUUGCCGAUAGAAUA |
